# Supplementary material for: Characterization of 3D-Printed Moulds for Soft Lithography of Millifluidic Devices
Source: MDPI journal article supplement (doi:10.3390/mi9030116), 2018-03-08
Supplement: s1 [file s1]

## Supplementary Materials: Characterization of 3D-Printed Moulds for Soft Lithography of Millifluidic Devices

Nurul Mohd Fuad, Megan Carve, Jan Kaslin and Donald Wlodkovic

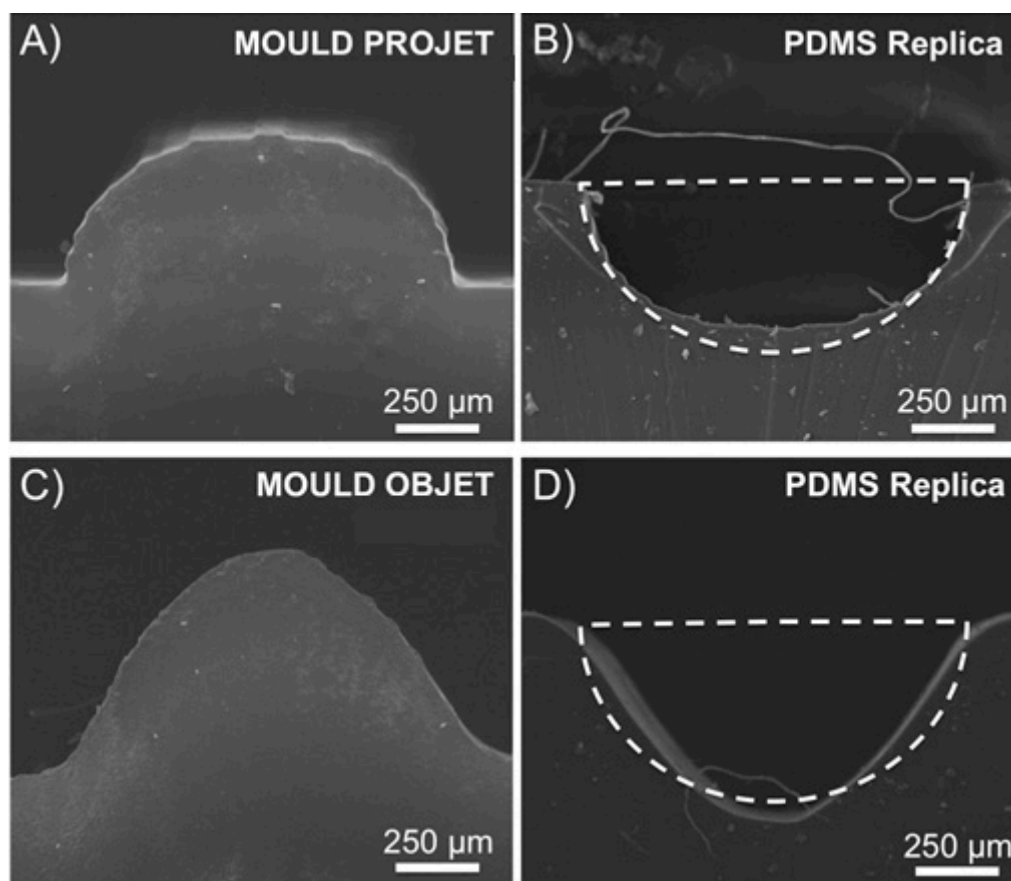

**Figure S1.** Physical characteristics of semi-circular positive relief patterns fabricated using additive manufacturing processes. (A) Pattern fabricated in VisJet Clear material using the ProJet 7000 HD system; (B) PDMS replica obtained from the master depicted in (A); (C) Pattern fabricated in Vero Clear using the Objet350 Connex system; (D) PDMS replica obtained from the master depicted in (C). Dotted lines represent the designed CAD geometry superimposed on SEM images of representative cross-sections.
